# Supplementary material
Source: PubMed Central journal article supplement (PMC4841621)
Supplement: NIHMS745619-supplement-DIgital_Content_1.pdf [file NIHMS745619-supplement-DIgital_Content_1.pdf]

## Supplementary Digital Content 1.

Get With The Guidelines-Resuscitation Investigators:

Besides the author Raina M. Merchant, MD, MSHP, members of the Get With The Guidelines-Resuscitation Adult Task Force include:

Steven M. Bradley MD, MPH, VA Eastern Colorado Healthcare System; Saket Girotra, MD, University of Iowa Carver College of Medicine; Paul S. Chan, MD MSc, Saint Luke's Mid America Heart Institute; Michael W. Donnino, MD, Beth Israel Deaconess Medical Center; Dana P. Edelson, MD, MS, University of Chicago; Robert T. Faillace, MD, ScM, Geisinger Healthcare System; Romergryko Geocadin, MD, Johns Hopkins University School of Medicine; Vincent N. Mosesso, Jr., MD, University of Pittsburgh School of Medicine; Joseph P. Ornato, MD and Mary Ann Peberdy, MD, Virginia Commonwealth University.
